# Supplementary material for: Mitigating interfacial reactions in Li 4 Ti 5 O 12 anodes through carbon shells synthesized by spray granulation
Source: Royal Society of Chemistry journal article supplement (doi:10.1039/d5ra00150a), 2025-01-01
Supplement: d5ra00150a1.pdf [file d5ra00150a1.pdf]

## Supporting Information

# Mitigating Interfacial Reactions in $\text{Li}_4\text{Ti}_5\text{O}_{12}$ Anodes through Carbon Shells Synthesized by Spray Granulation

Dong-Ze Wu<sup>a, b</sup>, Wen-Chia Hsu<sup>c</sup>, Chia-Huan Chung<sup>b, d</sup>, Hsin-Yu Hsieh<sup>b</sup>, Wei-Ming Chen<sup>b</sup>, Feng-Yu Wu<sup>b</sup>, Yu-Hsuan Su<sup>b</sup>, Hwai-En Lin<sup>e</sup>, Maw-Kuen Wu<sup>b</sup>, Phillip M. Wu<sup>b\*</sup>, Yu-Cheng Chiu<sup>a, f, g\*</sup>, and Po-Wei Chi<sup>b, h\*</sup>

<sup>a</sup> Graduate Institute of Energy and Sustainability Technology, National Taiwan University of Science and Technology, 43 Keelung Road, Sec 4, Taipei 10607, Taiwan

<sup>b</sup> Institute of Physics, Academia Sinica, 128, Section 2, Academia Road, Taipei 11529, Taiwan

<sup>c</sup> GUS Technology, Taoyuan City, 32063, Taiwan

<sup>d</sup> Graduate Institute of Applied Science and Technology, National Taiwan University of Science and Technology, 43 Keelung Road, Sec 4, Taipei 10607, Taiwan

<sup>e</sup> Department of Mechanical Engineering, College of Mechanical & Electrical Engineering, National Taipei University of Technology (TAIPEI TECH), 1, Section 3, Zhongxiao E. Rd., Taipei 106, Taiwan

<sup>f</sup> Department of Chemical Engineering, National Taiwan University of Science and Technology, 43 Keelung Road, Sec 4, Taipei 10607, Taiwan

<sup>g</sup> Sustainable Electrochemical Energy Development Center, National Taiwan University of Science and Technology, Taipei City 106, Taiwan

<sup>h</sup> Department of Mechanical Engineering, Chung Yuan Christian University 200, Chungpei Road, Chungli District, Taoyuan City 32023, Taiwan

\*Corresponding author

[ycchiu@mail.ntust.edu.tw](mailto:ycchiu@mail.ntust.edu.tw)

[pmwu429@gate.sinica.edu.tw](mailto:pmwu429@gate.sinica.edu.tw)

[poweichi@gate.sinica.edu.tw](mailto:poweichi@gate.sinica.edu.tw)/[pwchi@cycu.edu.tw](mailto:pwchi@cycu.edu.tw)

**Table S1.** Lattice parameters of LC0, LC5, LC7.5, and LC10.

| Sample | $a$ (Å) | $V$ (Å <sup>3</sup> ) | R profile |
|--------|---------|-----------------------|-----------|
| LC0    | 8.358   | 583.9                 | 4.50      |
| LC5    | 8.357   | 583.8                 | 4.18      |
| LC7.5  | 8.357   | 583.8                 | 4.59      |
| LC10   | 8.358   | 583.9                 | 4.37      |

**Table S2.** Particle size distribution and Zeta potential of LC0, LC5, LC7.5, and LC10.

| Sample | D10 (μm) | D50 (μm) | D90 (μm) | Zeta Potential (mV) |
|--------|----------|----------|----------|---------------------|
| LC0    | 4.36     | 8.14     | 13.76    | 65.04±1.5           |
| LC5    | 5.14     | 8.24     | 12.93    | -63.03±1.5          |
| LC7.5  | 5.27     | 8.73     | 13.98    | -55.57±1.5          |
| LC10   | 5.16     | 8.73     | 14.13    | -61.03±2            |

The zeta potentials of all samples were measured using an electrophoretic light scattering spectrophotometer (ELS-2000, Otsuka Electronics Co., Osaka, Japan). A dispersion of 0.05 g of LTO and LTO@C in 15 ml deionized water was prepared in a quartz cell to determine the electrophoretic mobility.

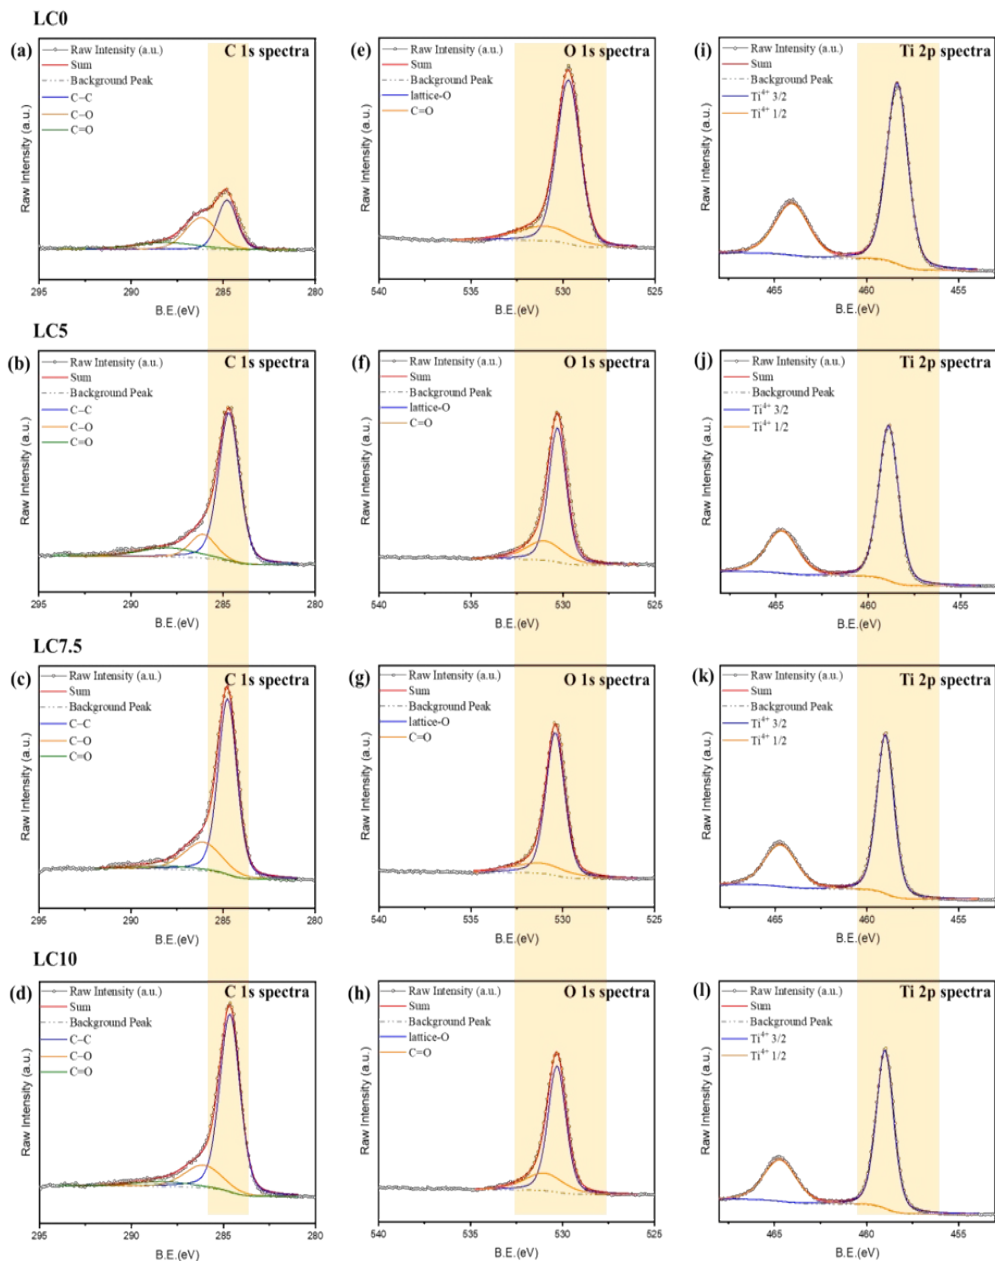

**Figure S1.** (a-d) C 1s, (e-h) O 1s, and (i-l) Ti 2p XPS spectra of LC0, LC5, LC7.5, and LC10 powders.

We employed XPS analysis to investigate the differences in the C 1s, O 1s, and Ti 2p core-level spectra of the LTO and LTO@C powders, as shown in **Figure S1**. Obviously, the core-level spectra of LTO@C exhibited changes with increasing sucrose concentrations (5%, 7.5%, and 10%) following carbon coating. In the C 1s

spectrum (**Figures S1 (b)-(d)**), the C-C signal intensity gradually increased due to the carbon coating, which also influenced the O 1s and Ti 2p spectra. The lattice oxygen signal intensity in the O 1s and Ti 2p spectra of LTO@C significantly decreased due to the carbon coating, with the signal peaks shifting to higher binding energies. [1]

As shown in **Figures S1 (a), (e), and (i)**, the C 1s spectrum of LTO powder showed signals at 284.8 eV (C-C), 286.1 eV (C-O), and 289 eV (C=O). The C-C signal mainly originates from adventitious carbon, while C=O is contributed by the residual  $\text{Li}_2\text{CO}_3$  on the surface. In the O 1s spectrum, the signal at 529.8 eV mainly corresponds to the lattice oxygen of LTO, while the signal at 531 eV (C=O) is attributed to  $\text{Li}_2\text{CO}_3$ . The Ti 2p spectrum consists of a doublet of peaks located at 458.3 eV and 464 eV, corresponding to the  $\text{Ti}^{4+}$  ion of LTO. [2, 3]

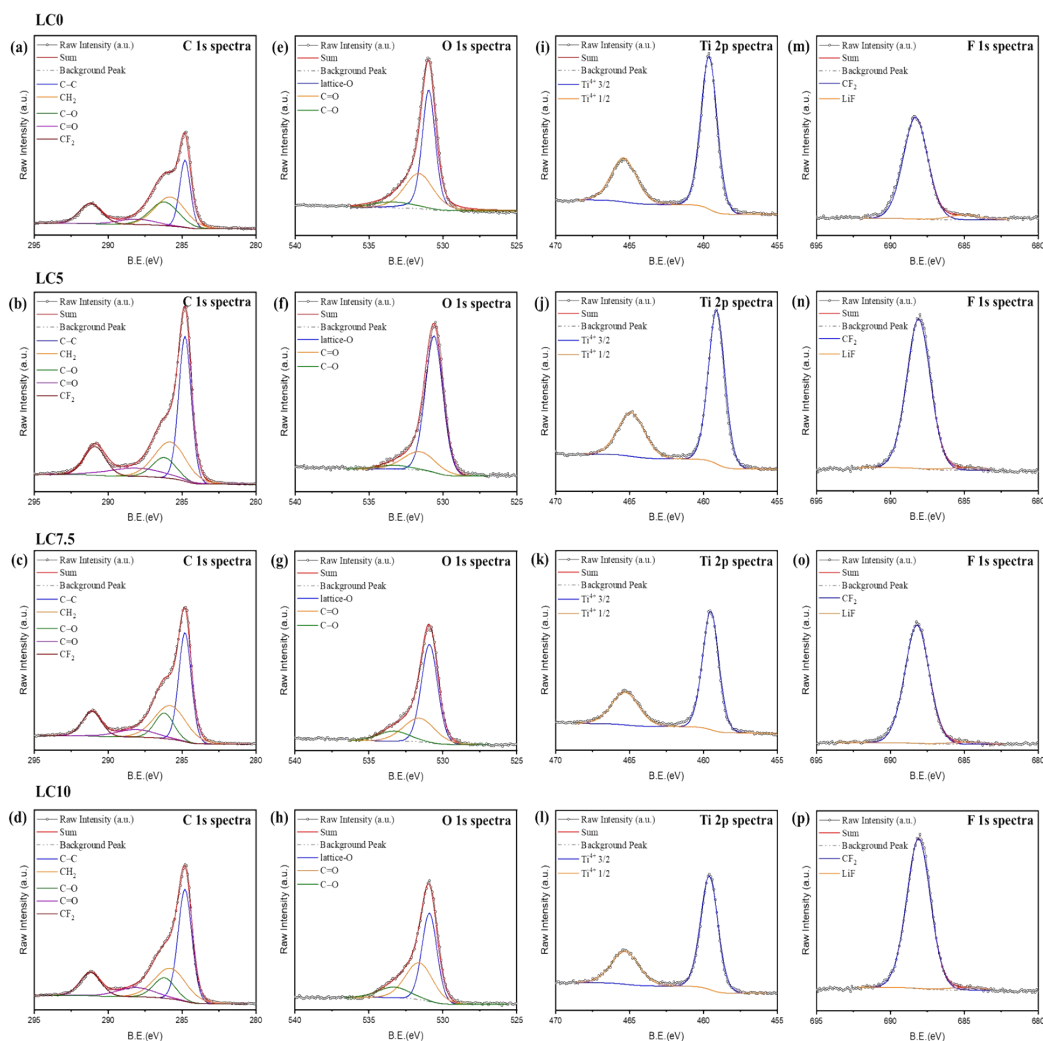

**Figure S2.** The XPS spectra of the LC0, LC5, LC7.5, and LC10 electrodes before 200 cycles. (a-d) C 1s, (e-h) O 1s, (i-l) Ti 2p, and (m-p) F 1s regions.

**Figure S2** presents the XPS spectra of the LC0, LC5, LC7.5, and LC10 electrodes. The C 1s spectra reveal additional signals at 285.7 eV (CH<sub>2</sub>) and 291 eV (CF<sub>2</sub>) beyond those observed from the powder, attributed to the PVDF binder. The (C-C) signal also includes contributions from carbon black (Super P). The O 1s and Ti 2p spectra remained largely unchanged compared to those of the powder. In the F 1s spectra, signals at 685 eV (LiF) and 688 eV (CF<sub>2</sub>) were detected, with the CF<sub>2</sub> signal originating from PVDF and the small LiF peak likely resulting from surface contamination during sample preparation. [4-7]

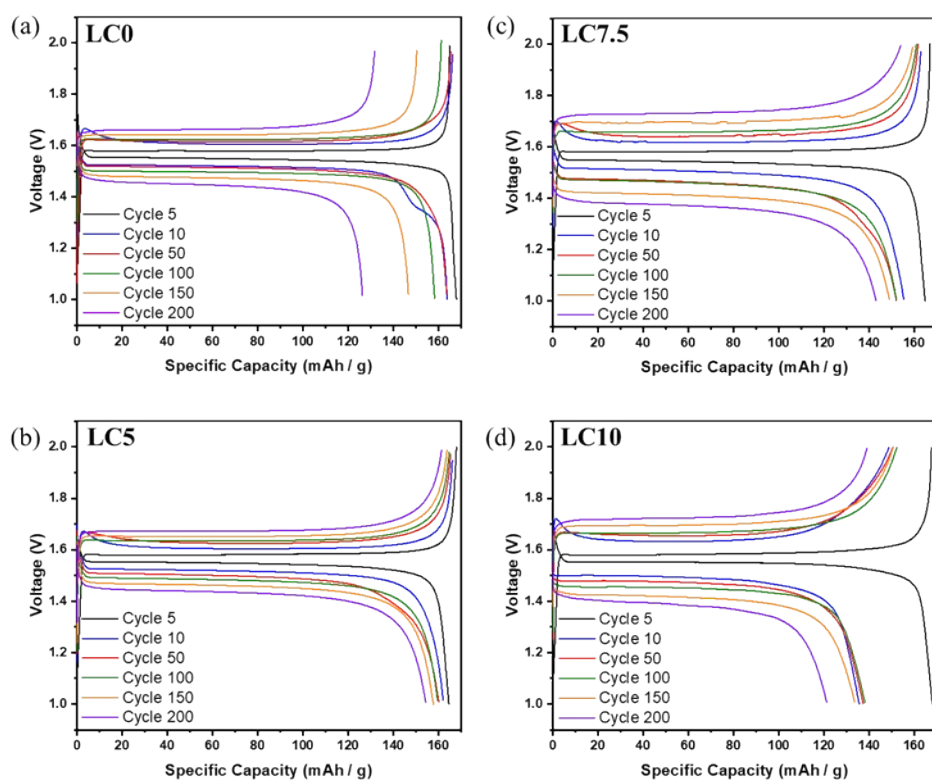

**Figure S3.** Charge-discharge curves (a) LC0, (b) LC5, (c) LC7.5, and (d) LC10 under 1C with potential range examined from 1 V to 2 V.

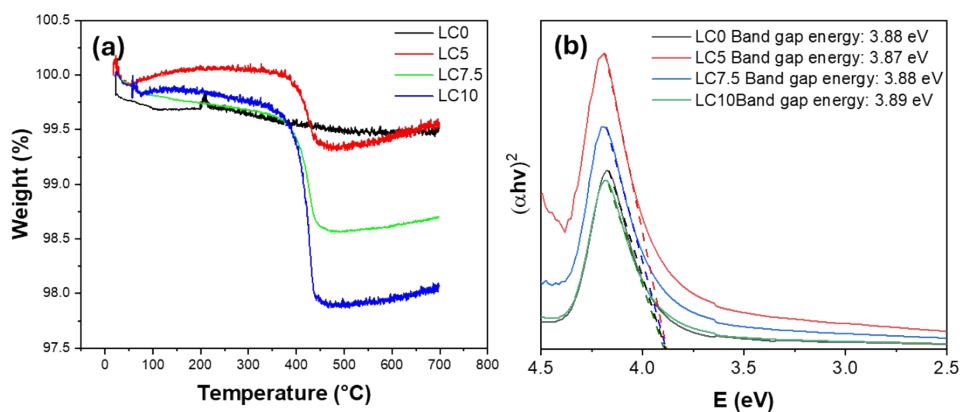

**Figure S4.** (a) TGA curves of LC0, LC5, LC7.5, and LC10 powders. (b) Tauc plots of LC0, LC5, LC7.5, and LC10 samples derived from UV-Vis reflectance spectra.

## References

- [1] S. J. Rezvani *et al.*, "Binder-Induced Surface Structure Evolution Effects on Li-Ion Battery Performance." *Appl. Surf. Sci.*, vol. 435, 2018, pp. 1029–1036.
- [2] R. T. Haasch *et al.*, "Lithium-Based Transition-Metal Oxides for Battery Electrodes Analyzed by X-Ray Photoelectron Spectroscopy. X.  $\text{Li}_4\text{Ti}_5\text{O}_{12}$ ." *Surf. Sci. Spectra*, vol. 26, 2019, 014012.
- [3] D. V. Pelegov *et al.*, "Efficiency Threshold of Carbon Layer Growth in  $\text{Li}_4\text{Ti}_5\text{O}_{12}/\text{C}$  Composites." *J. Electrochem. Soc.*, vol. 166, no. 3, 2019, A5019-A5024.
- [4] Y. He *et al.*, "Gassing in  $\text{Li}_4\text{Ti}_5\text{O}_{12}$ -Based Batteries and Its Remedy." *Sci. Rep.*, vol. 2, 2012, article 913.
- [5] J. Gieu *et al.*, "Influence of Vinylene Carbonate Additive on the  $\text{Li}_4\text{Ti}_5\text{O}_{12}$  Electrode/Electrolyte Interface for Lithium-Ion Batteries." *J. Electrochem. Soc.*, vol. 164, no. 6, 2017, A1314-A1320.
- [6] S. Malmgren *et al.*, "Comparing Anode and Cathode Electrode/Electrolyte Interface Composition and Morphology Using Soft and Hard X-Ray Photoelectron Spectroscopy." *Electrochim. Acta*, vol. 97, 2013, pp. 23–32.
- [7] R. Dedryvère *et al.*, "Electrode/Electrolyte Interface Reactivity in High-Voltage Spinel  $\text{LiMn}_{1.6}\text{Ni}_{0.4}\text{O}_4/\text{Li}_4\text{Ti}_5\text{O}_{12}$  Lithium-Ion Battery." *J. Phys. Chem. C*, vol. 114, 2010, pp. 10999–11008.
